# Supplementary material
Source: PubMed Central journal article supplement (PMC2888416)
Supplement: supp_M110.104190_jbc.M110.104190-1.pdf [file supp_M110.104190_jbc.M110.104190-1.pdf]

SUPPLEMENTAL FIGURE 1

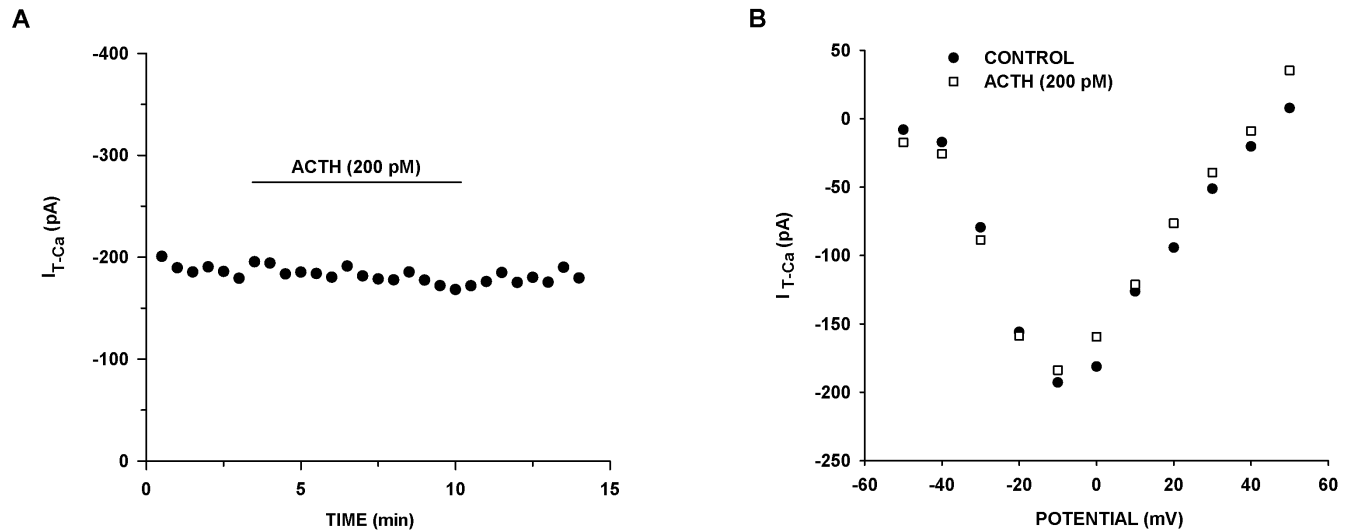

**Supplemental Figure 1. ACTH has no rapid effect on  $Ca_v3.2$  channel activity in bovine AZF cells.**

A)  $Ca^{2+}$  currents were activated by voltage steps of 300 ms duration applied at 30 s intervals from a holding potential of -80 mV to a test potential of -5 mV. After recording currents in standard saline, cells were superfused with saline containing ACTH (200 pM). Peak current amplitudes are plotted against time. B) Effect of ACTH on  $Ca_v3.2$  current-voltage relationship.  $Ca^{2+}$  currents were activated from -80 mV by voltage steps applied at 0.1 Hz to test potentials between -60 and +60 mV before and after superfusing cell with ACTH (200 pM). Peak  $Ca^{2+}$  current amplitudes before and after exposing cell to ACTH are plotted against test potential.

SUPPLEMENTAL FIGURE 2

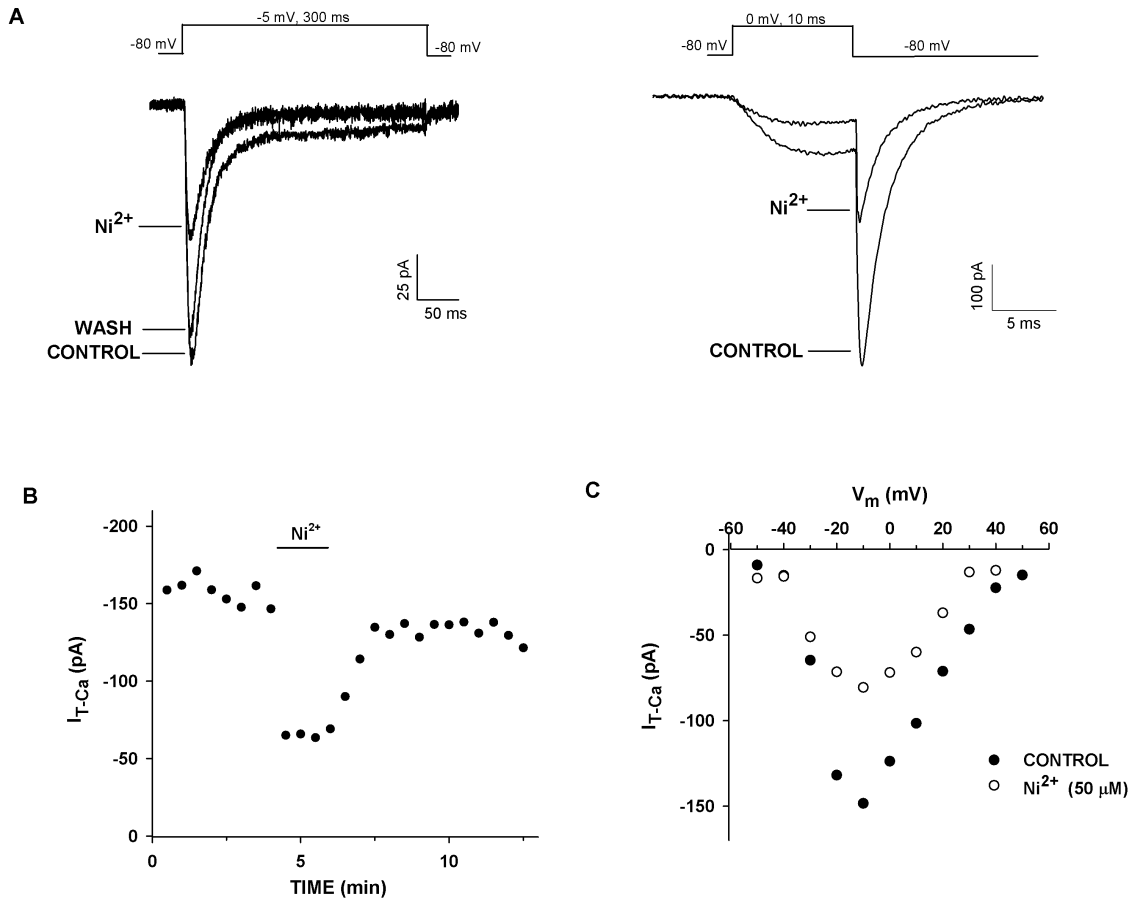

**Supplemental Figure 2. Effect of Ni<sup>2+</sup> on Ca<sub>v</sub>3.2 T-type Ca<sup>2+</sup> Current in bovine AZF cells.** AZF cells were cultured for 72 h in standard media supplemented with 8CPT-2'-OMe-cAMP (50 μM). Whole cell Ca<sup>2+</sup> currents were recorded after activation by long (300 ms) or short (10 ms) voltage steps applied at 30 s intervals from a holding potential of -80 mV. After recording current in standard saline (control), cells were superfused with saline containing Ni<sup>2+</sup> (50 μM). **A**) Ca<sup>2+</sup> current traces activated by long (left) and short (right) voltage steps before (control) and after superfusing Ni<sup>2+</sup> (50 μM), as indicated. **B**) Plot of T-type-Ca<sup>2+</sup> current amplitude against time with 50 μM Ni<sup>2+</sup> treatment at indicated times. **C**) Current-voltage relationship: peak current amplitudes from 8CPT-2'-OMe-cAMP-treated cells without (control) or with Ni<sup>2+</sup> (50 μM) are plotted against test potential.
